# Supplementary material
Source: PubMed Central journal article supplement (PMC10617484)
Supplement: sj-pdf-1-han-10.1177_15589447221093674.pdf [file sj-pdf-1-han-10.1177_15589447221093674.pdf]

**Supplemental Figure 1. Correlation between DIP flexion loss and DASH score at final visit.**

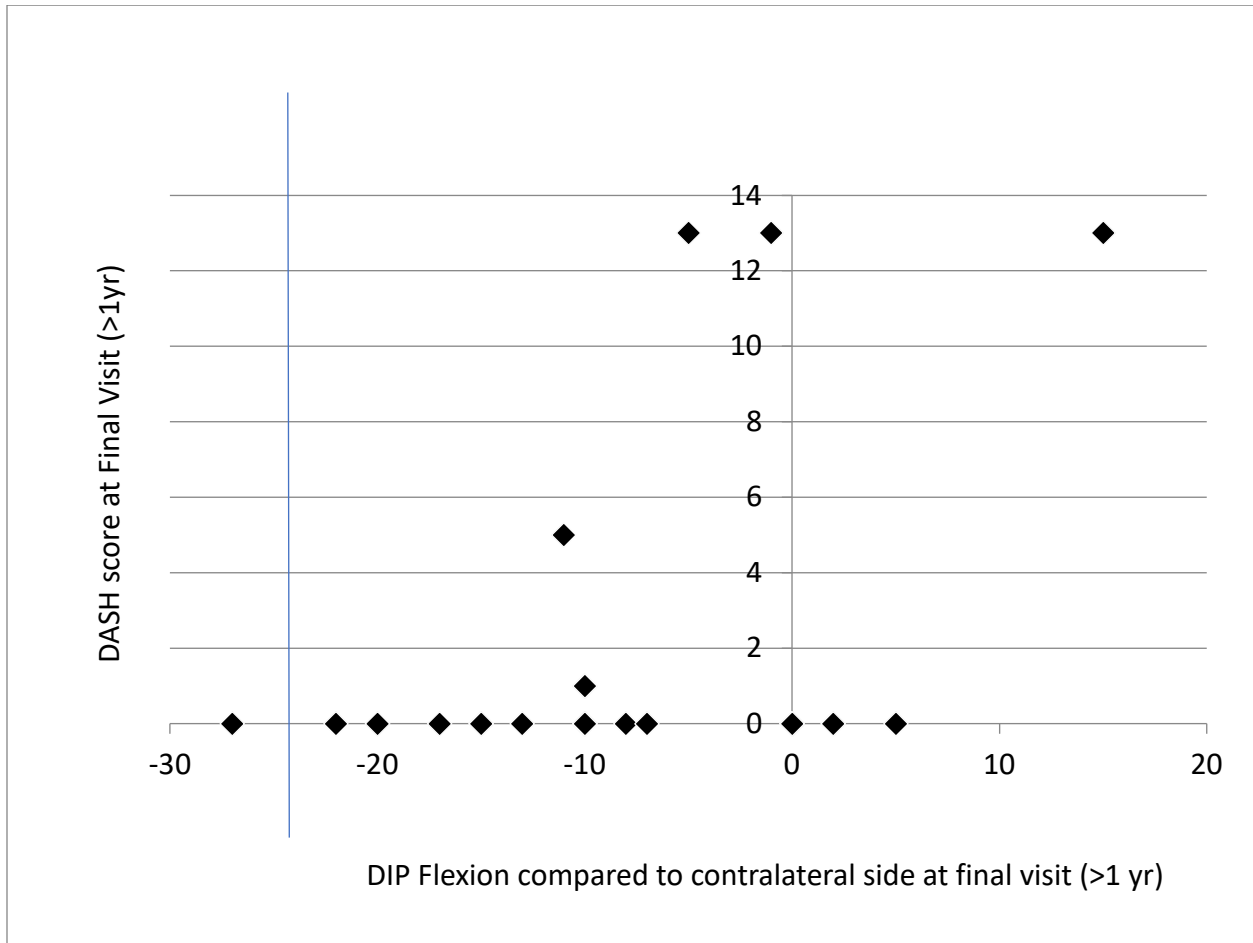

**Supplemental Figure 1. Correlation between DIP flexion loss and DASH score at final visit.**

Spearman correlation coefficient  $R = 0.33$ ,  $p = 0.05$ . DIP flexion loss shown as difference from contralateral side, i.e., negative values indicate loss of flexion as compared with contralateral side.
