# Supplementary material
Source: PubMed Central journal article supplement (PMC10617484)
Supplement: sj-pdf-2-han-10.1177_15589447221093674.pdf [file sj-pdf-2-han-10.1177_15589447221093674.pdf]

Supplemental Figure 2. Correlation between clinical extension lag and x-ray extension lag.

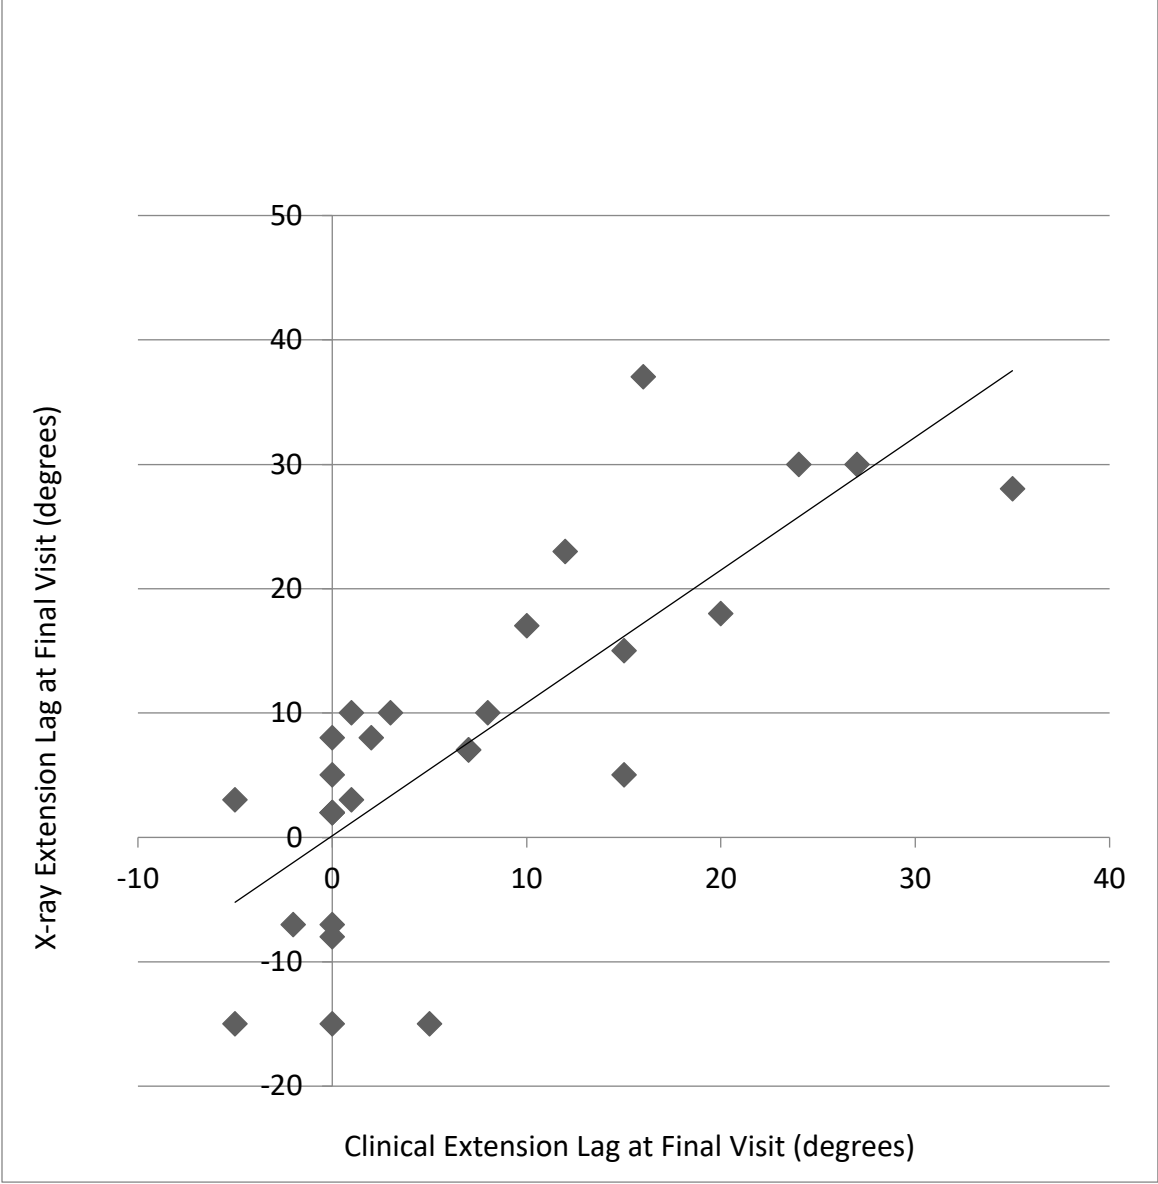

Supplemental Figure 2. Correlation between clinical extension lag and x-ray extension lag.

Spearman correlation coefficient  $R = 0.84$ ,  $p < 0.0001$ . Both methods of measurement are as compared with contralateral side.
